# Supplementary material for: Identifying clinically important COPD sub-types using data-driven approaches in primary care population based electronic health records
Source: PubMed Central journal article supplement (PMC6472089; doi:10.1186/s12911-019-0805-0), 2019-04-18
Supplement: 12911_2019_805_MOESM2_ESM.pdf [file 12911_2019_805_MOESM2_ESM.pdf]

Variable Loadings

| variable         | value | Factor score |              |              | Squared cosines |             |             | Contributions x 1000 |             |             |
|------------------|-------|--------------|--------------|--------------|-----------------|-------------|-------------|----------------------|-------------|-------------|
|                  |       | 1            | 2            | 3            | 1               | 2           | 3           | 1                    | 2           | 3           |
| BMI              | 1     | -0.175169339 | 0.052189757  | -0.097405377 | 0.71532046      | 0.063497264 | 0.221182277 | 38.57346838          | 11.94400182 | 162.3957424 |
| BMI              | 2     | -0.072360938 | 0.02660057   | -0.007188246 | 0.873358667     | 0.118022864 | 0.008618469 | 50.21564786          | 23.67115195 | 6.747032915 |
| BMI              | 3     | 0.027357872  | 0.007127     | 0.0227426    | 0.568529        | 0.038583495 | 0.392887505 | 7.463594887          | 1.766866811 | 70.22632226 |
| BMI              | 4     | 0.070494236  | -0.043062971 | -0.003891372 | 0.726632205     | 0.271153616 | 0.00221418  | 45.21176121          | 58.85169703 | 1.875797331 |
| GOLD stage       | 1     | -0.020072677 | -0.01784586  | 0.028158252  | 0.266076219     | 0.21031508  | 0.5236087   | 3.116192363          | 8.592022786 | 83.4951643  |
| GOLD stage       | 2     | 0.010951669  | -0.007812199 | 0.008972056  | 0.458715301     | 0.233415255 | 0.307869445 | 1.811319914          | 3.215051836 | 16.55216455 |
| GOLD stage       | 3     | 0.008714714  | 0.031036324  | -0.040645633 | 0.028219509     | 0.357918176 | 0.613862316 | 0.461743765          | 20.42876697 | 136.7599202 |
| GOLD stage       | 4     | -0.063048081 | 0.06721727   | -0.106016751 | 0.201444592     | 0.228967379 | 0.569588029 | 3.980291264          | 15.78118682 | 153.2344326 |
| Gender           | 0     | -0.069095944 | -0.025261026 | 0.003515877  | 0.880089735     | 0.117631554 | 0.00227871  | 64.75503465          | 30.19098122 | 2.282821498 |
| Gender           | 1     | 0.057305698  | 0.02095059   | -0.002915942 | 0.880089735     | 0.117631554 | 0.00227871  | 53.70550386          | 25.03931729 | 1.893290297 |
| Smoking          | 0     | 0.074067525  | -0.009149344 | 0.008618605  | 0.972007237     | 0.014831795 | 0.013160968 | 77.00376356          | 4.098670229 | 14.1960186  |
| Smoking          | 1     | -0.065464781 | 0.008086672  | -0.007617578 | 0.972007237     | 0.014831795 | 0.013160968 | 68.05998365          | 3.622620712 | 12.54718925 |
| Anxiety          | 0     | 0.013388502  | 0.017708898  | 0.002389835  | 0.35953342      | 0.629011162 | 0.011455417 | 4.815528356          | 29.38798693 | 2.089064578 |
| Anxiety          | 1     | -0.117818822 | -0.155838306 | -0.021030544 | 0.35953342      | 0.629011162 | 0.011455417 | 42.37664953          | 258.614285  | 18.38376829 |
| Depression       | 0     | 0.015298124  | 0.018191609  | 0.002443369  | 0.409909467     | 0.579633954 | 0.010456579 | 6.217996359          | 30.67066135 | 2.159675084 |
| Depression       | 1     | -0.121386647 | -0.1443457   | -0.019387498 | 0.409909467     | 0.579633954 | 0.010456579 | 49.33818992          | 243.3637505 | 17.13646218 |
| Eosinophils > 2% | 0     | -0.043527648 | -0.007010372 | -0.012815726 | 0.898774352     | 0.023313227 | 0.077912421 | 19.42447084          | 1.757550135 | 22.92669744 |
| Eosinophils > 2% | 1     | 0.022692759  | 0.003654796  | 0.006681367  | 0.898774352     | 0.023313227 | 0.077912421 | 10.12677818          | 0.916283409 | 11.95263342 |
| Atopy            | 0     | -0.001683287 | 0.007135593  | -0.001903293 | 0.049386828     | 0.887472903 | 0.063140269 | 0.074323987          | 4.658861252 | 1.293780407 |
| Atopy            | 1     | 0.011977277  | -0.050772681 | 0.013542716  | 0.049386828     | 0.887472903 | 0.063140269 | 0.528845747          | 33.14971463 | 9.205779906 |
| CRS              | 0     | 0.000763187  | 0.001833239  | -0.000978298 | 0.118861404     | 0.685830304 | 0.195308292 | 0.017092359          | 0.344020754 | 0.382400206 |
| CRS              | 1     | -0.039154089 | -0.094051351 | 0.050189982  | 0.118861404     | 0.685830304 | 0.195308292 | 0.876895656          | 17.64942428 | 19.61841957 |
| Diabetes         | 0     | -0.029238537 | 0.008651148  | 0.003365247  | 0.908435894     | 0.079529912 | 0.012034194 | 21.41251165          | 6.53898945  | 3.86212757  |
| Diabetes         | 1     | 0.150367412  | -0.044490966 | -0.017306733 | 0.908435894     | 0.079529912 | 0.012034194 | 110.1198738          | 33.62859552 | 19.86207913 |
| Hypertension     | 0     | -0.029523044 | 0.007884106  | 0.001470626  | 0.931275061     | 0.066414152 | 0.002310787 | 17.21874659          | 4.283423333 | 0.581727788 |
| Hypertension     | 1     | 0.057391812  | -0.015326439 | -0.002858847 | 0.931275061     | 0.066414152 | 0.002310787 | 33.47266839          | 8.326831925 | 1.130859395 |
| Heart failure    | 0     | -0.02591475  | 0.007705477  | 0.005601598  | 0.880953546     | 0.077885744 | 0.041160711 | 17.00222396          | 5.243454505 | 10.81612903 |
| Heart failure    | 1     | 0.142614394  | -0.04240488  | -0.030826789 | 0.880953546     | 0.077885744 | 0.041160711 | 93.56686312          | 28.85584798 | 59.5234639  |
| IHD              | 0     | -0.039508696 | 0.005156171  | 0.005505663  | 0.964830528     | 0.016433129 | 0.018736344 | 35.90666131          | 2.133295668 | 9.493909798 |
| IHD              | 1     | 0.131445925  | -0.017154645 | -0.018317408 | 0.964830528     | 0.016433129 | 0.018736344 | 119.4619094          | 7.09750126  | 31.58635615 |
| GERD             | 0     | 0.002439475  | 0.007786075  | -0.00266263  | 0.080786673     | 0.822970415 | 0.096242911 | 0.161914461          | 5.753563946 | 2.626339923 |
| GERD             | 1     | -0.024495429 | -0.078182093 | 0.026736192  | 0.080786673     | 0.822970415 | 0.096242911 | 1.62582704           | 57.7730968  | 26.37179182 |
| Therapy          | 0     | -0.008189178 | 0.010493105  | 0.012602249  | 0.199600353     | 0.327709236 | 0.47269041  | 0.756417218          | 4.332071236 | 24.3900765  |
| Therapy          | 1     | 0.003263532  | 0.011762451  | -0.000477133 | 0.071368954     | 0.927105544 | 0.001525502 | 0.041316991          | 1.872213358 | 0.012024537 |
| Therapy          | 2     | 0.000707873  | -0.012036502 | -0.001843225 | 0.003368049     | 0.973795738 | 0.022836214 | 0.004973642          | 5.016153466 | 0.459152028 |
| Therapy          | 3     | 0.015038431  | -0.009210161 | -0.025242384 | 0.238519391     | 0.089464978 | 0.672015631 | 1.09301605           | 1.430087844 | 41.92938518 |
